# Supplementary material for: The research topic landscape in the literature of social class and inequality
Source: PubMed Central journal article supplement (PMC6028105; doi:10.1371/journal.pone.0199510), 2018-07-02

**S1 Fig: The Temporal Trajectories of 25 Topics**

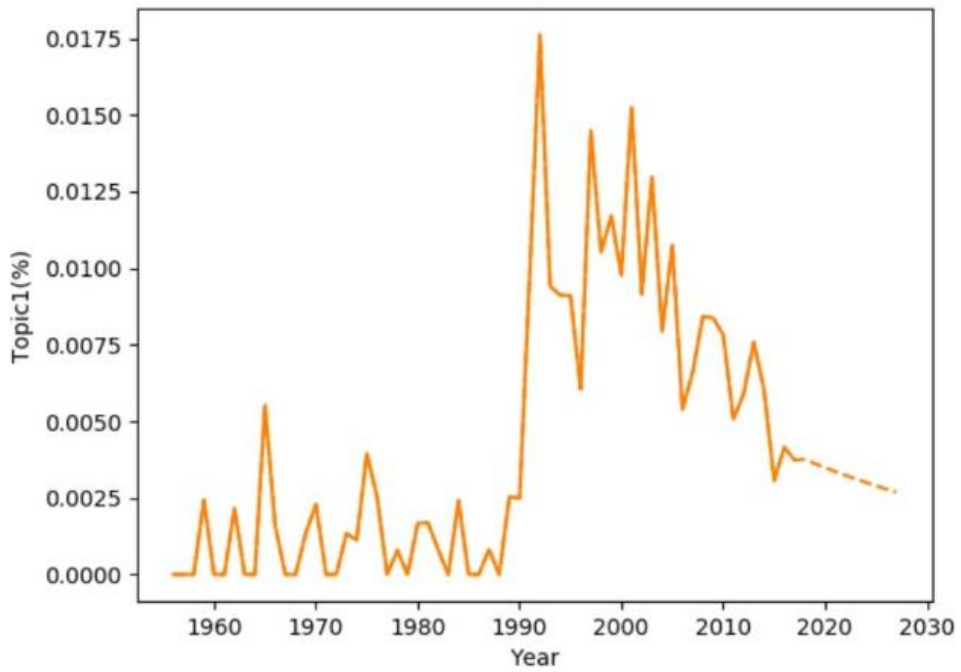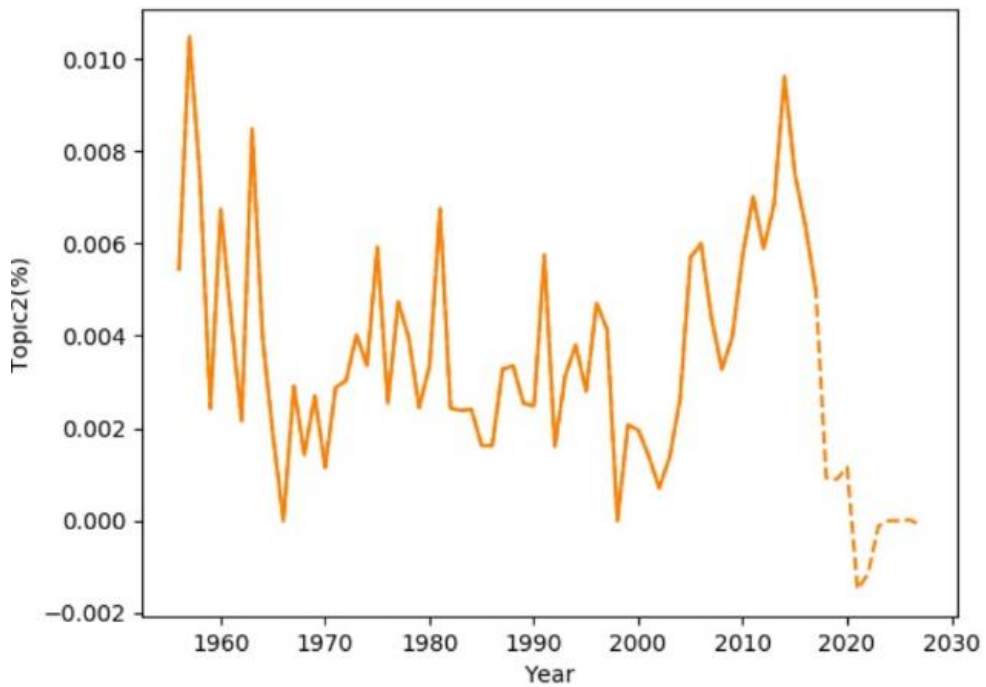

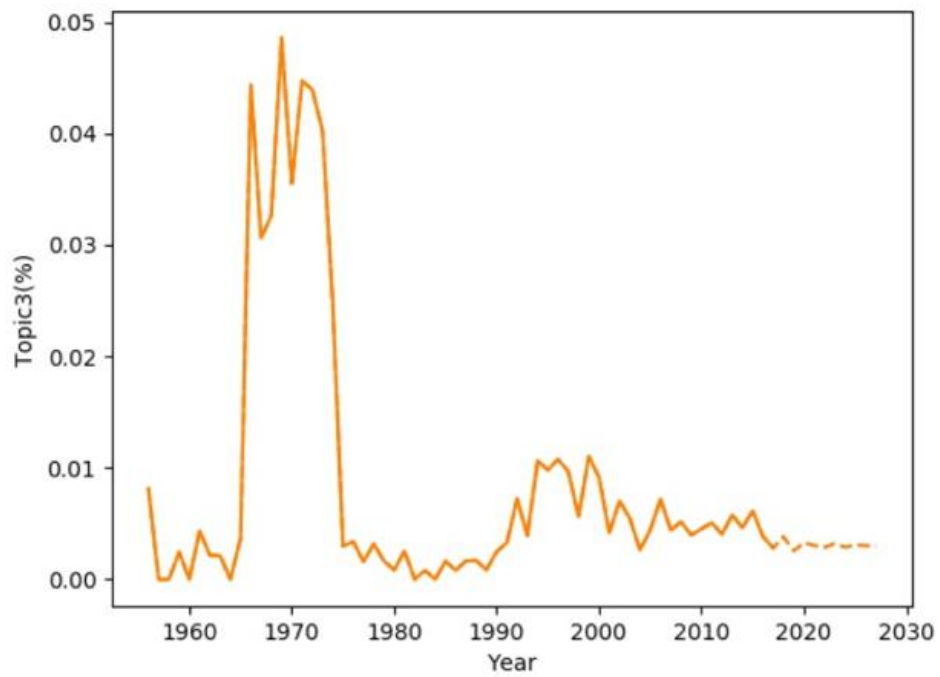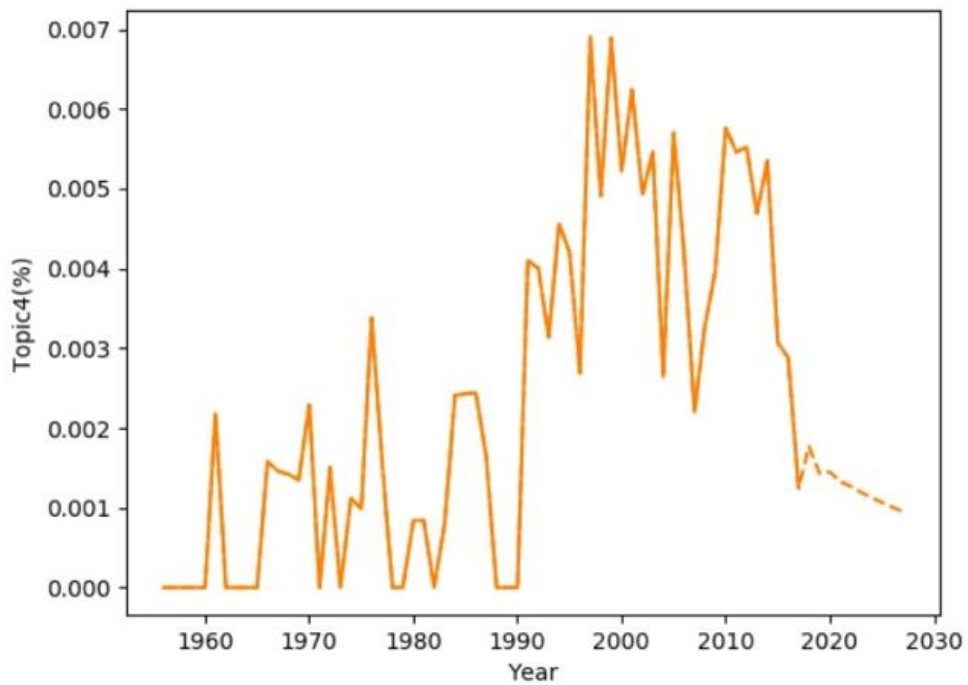

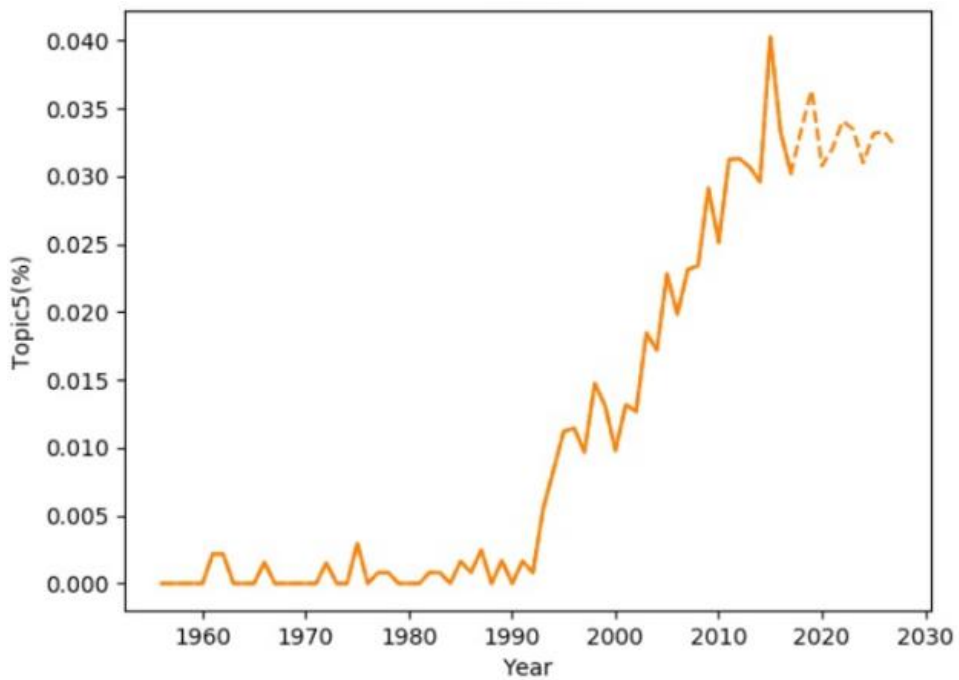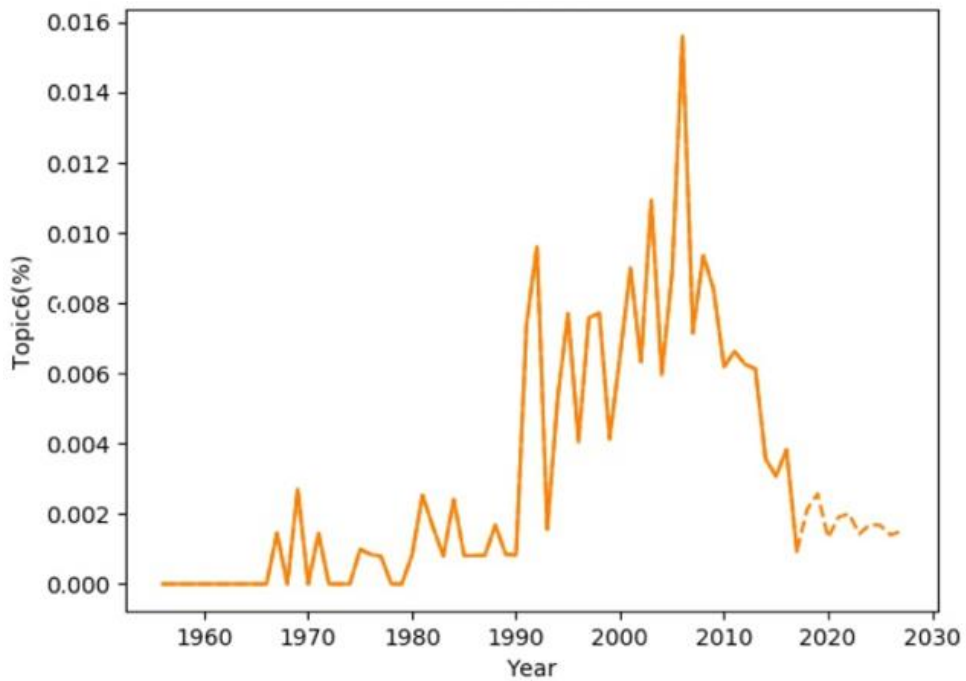

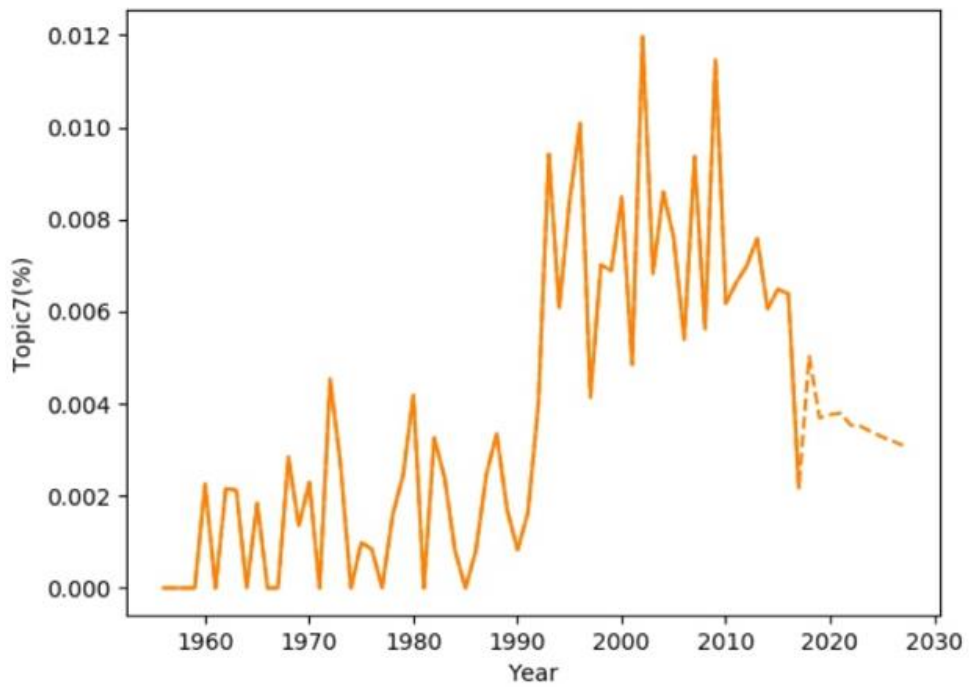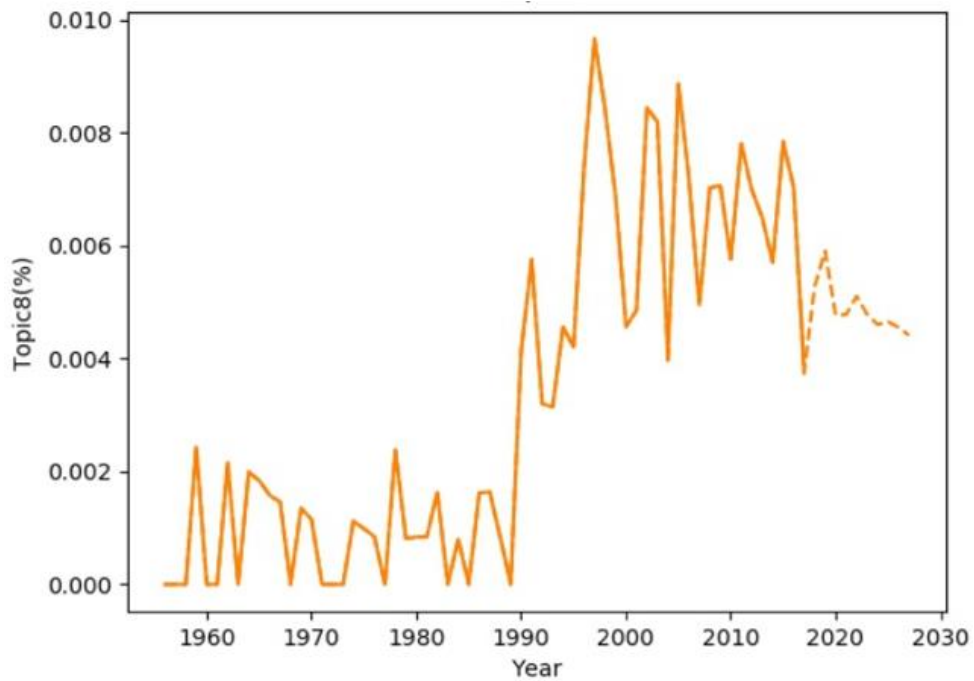

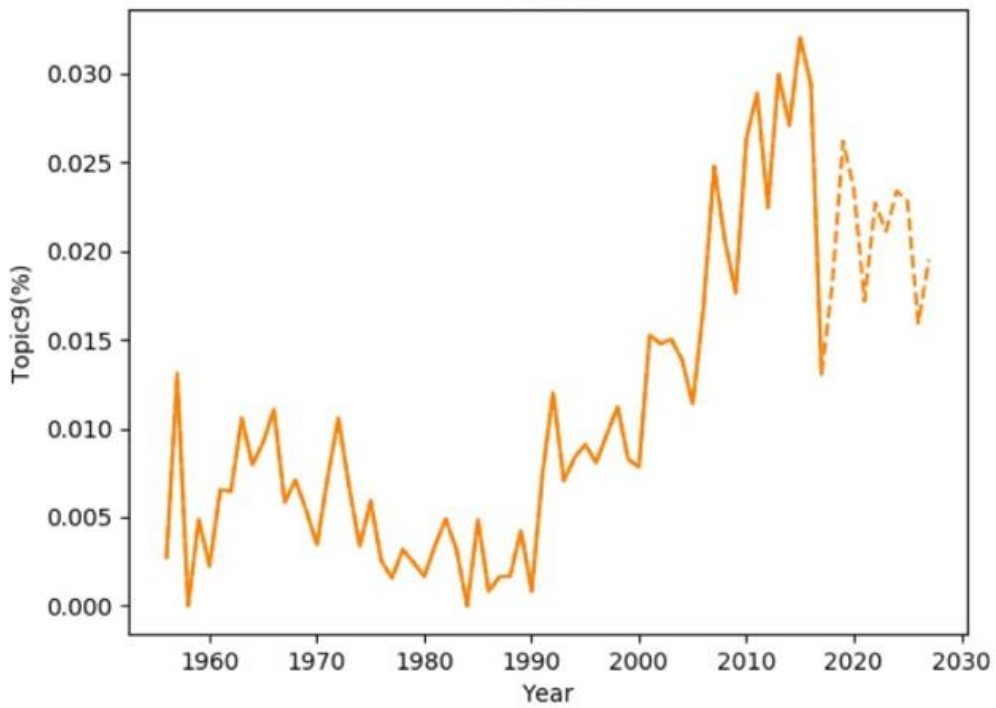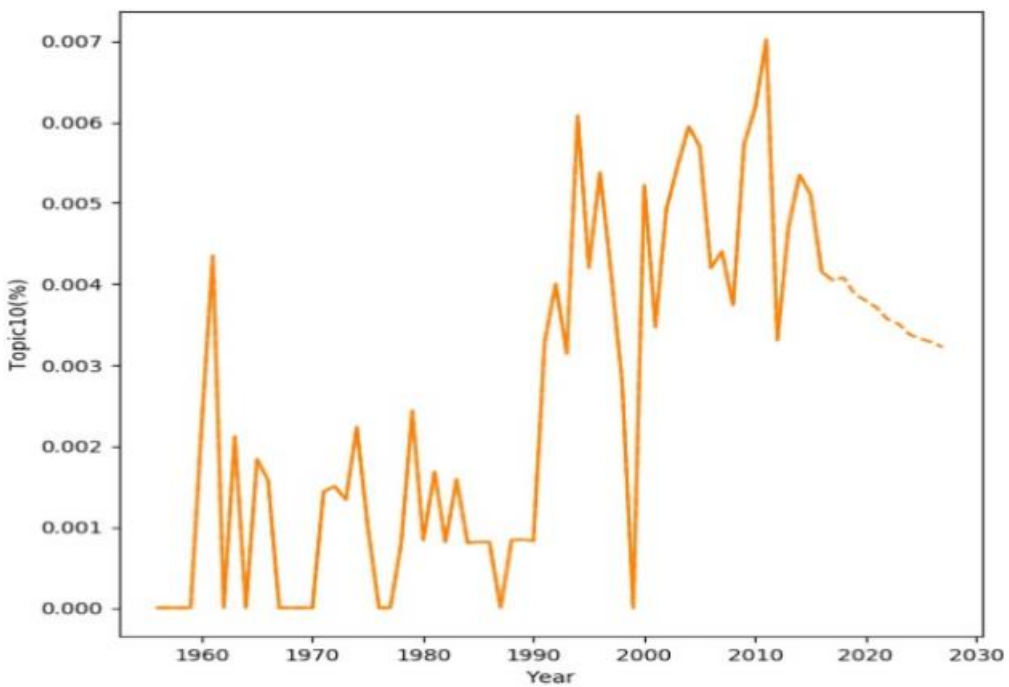

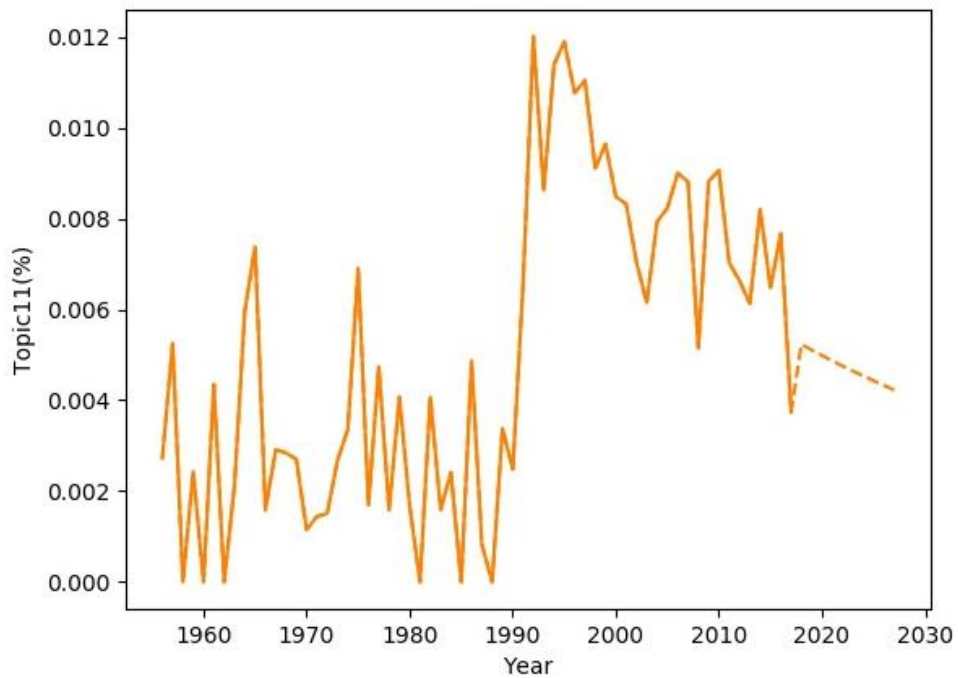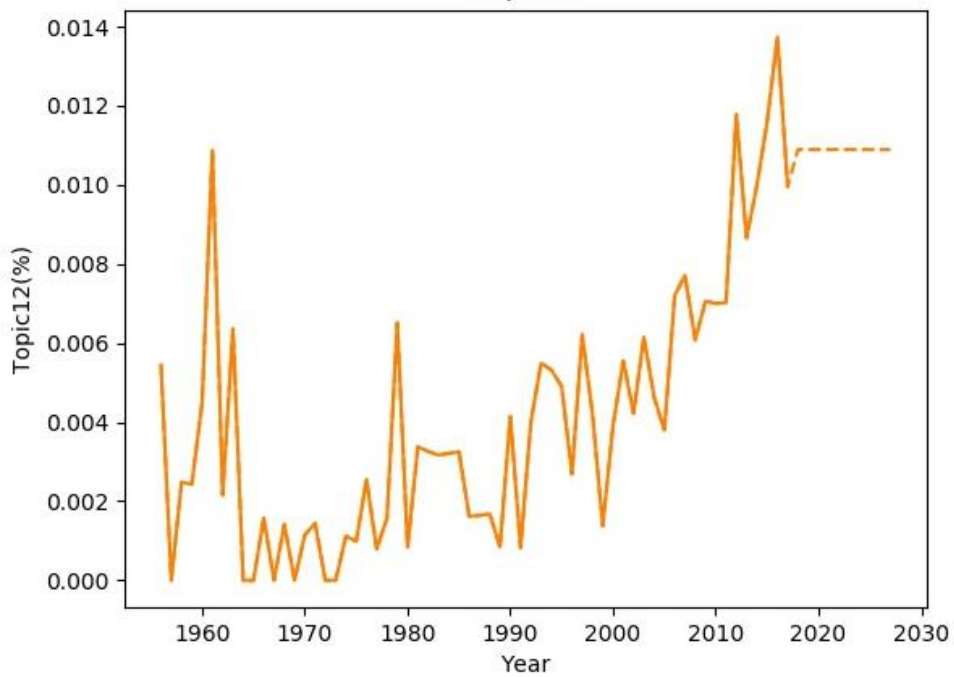

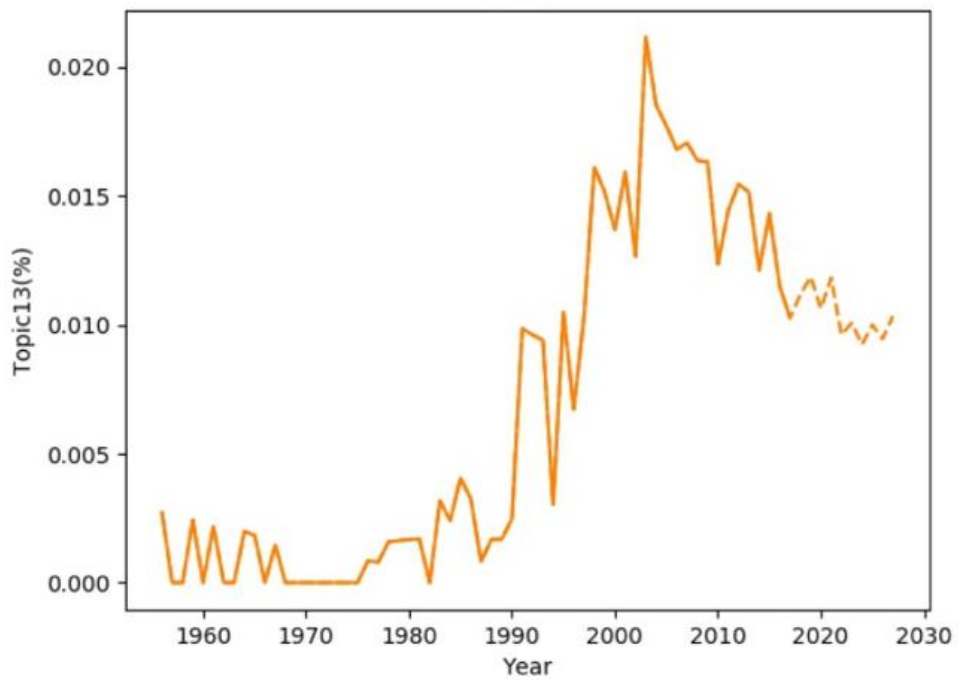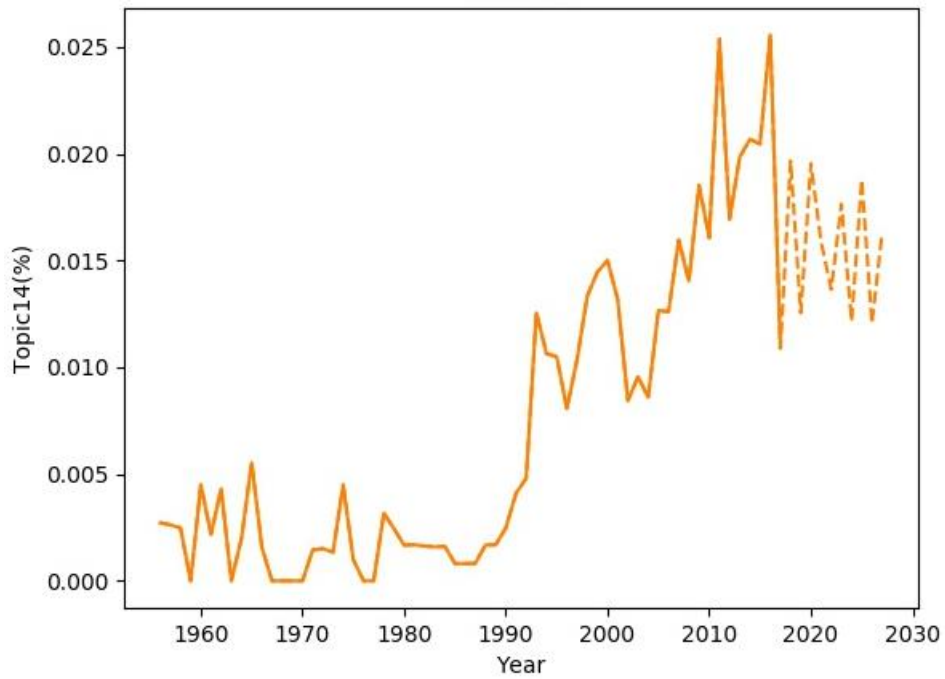

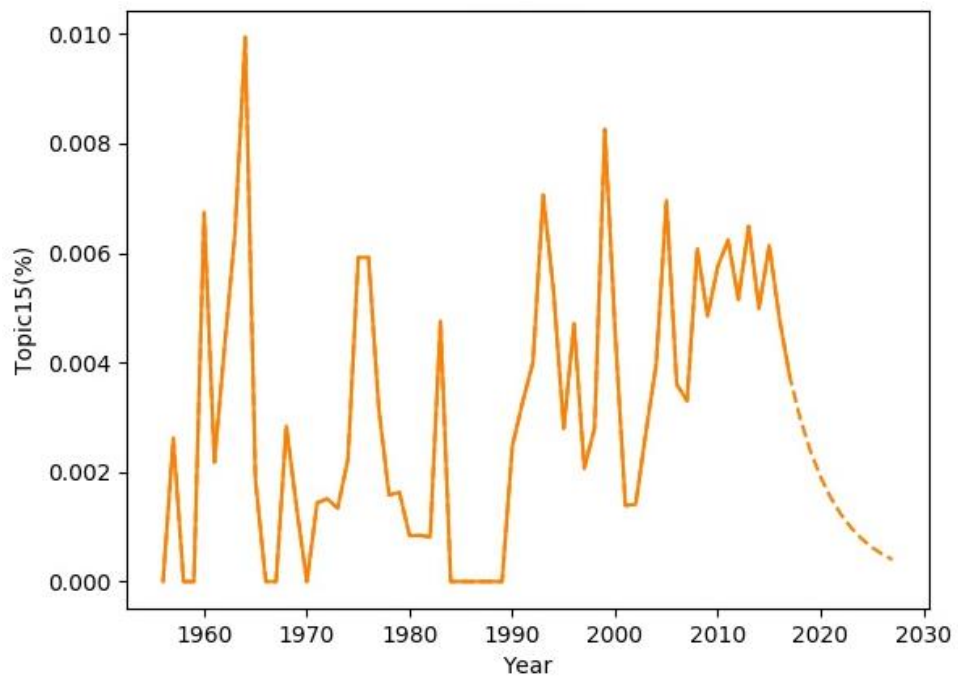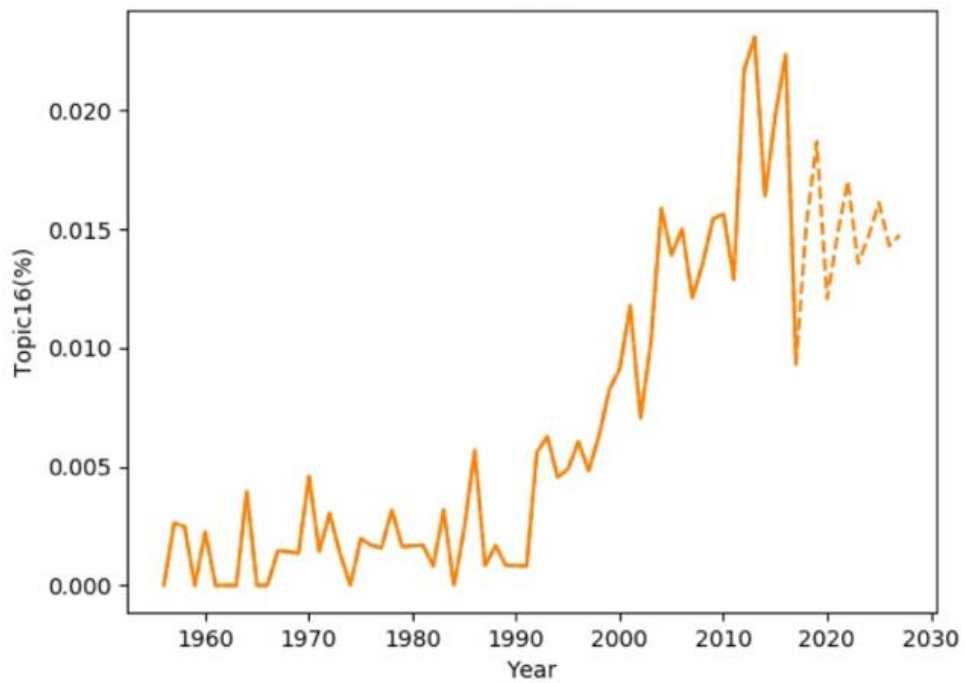



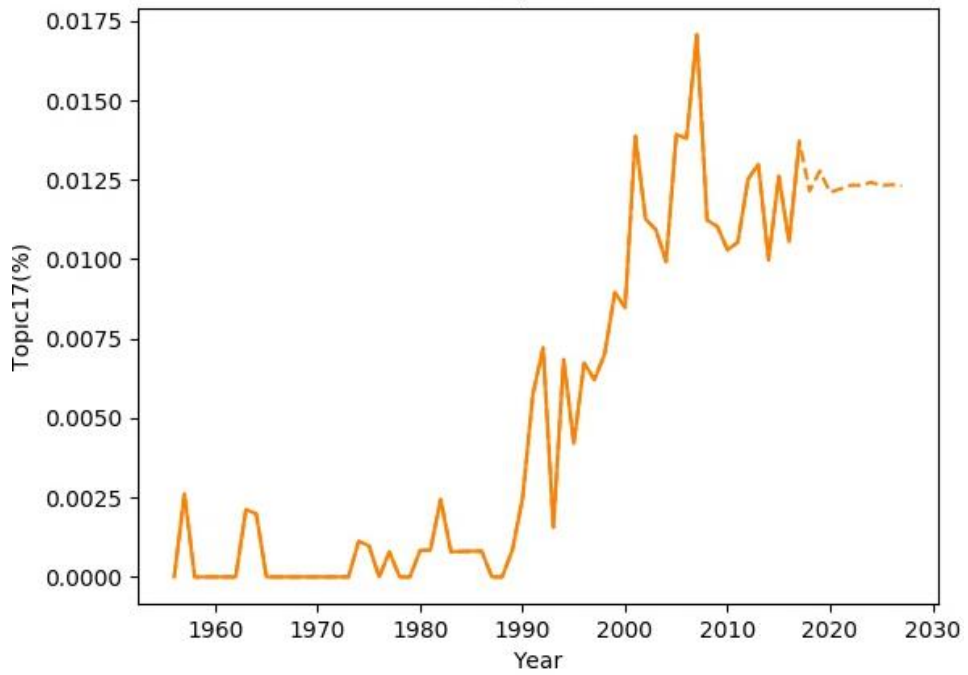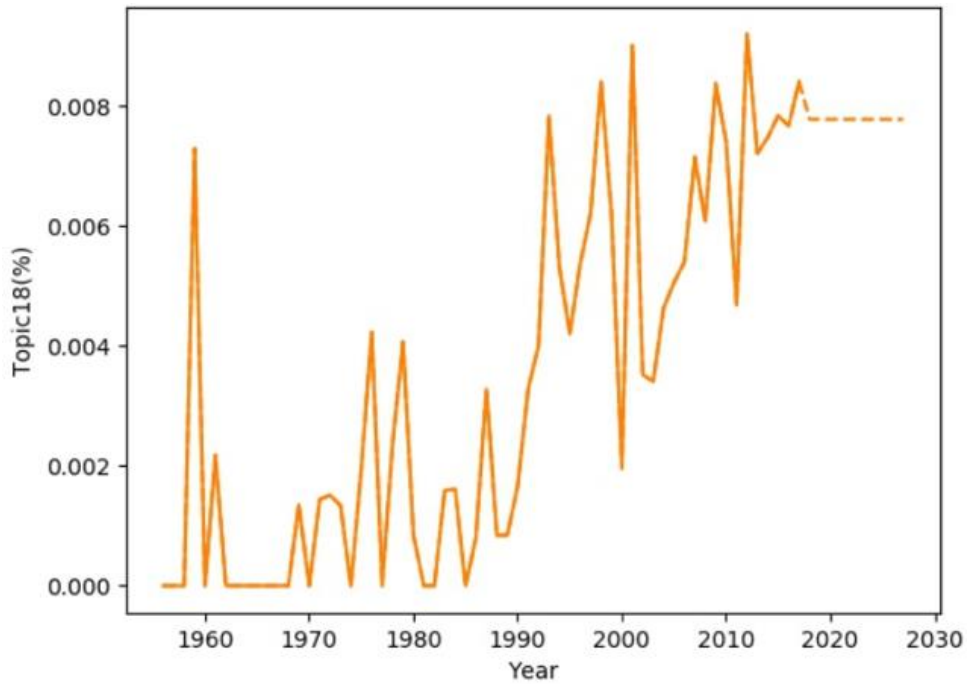

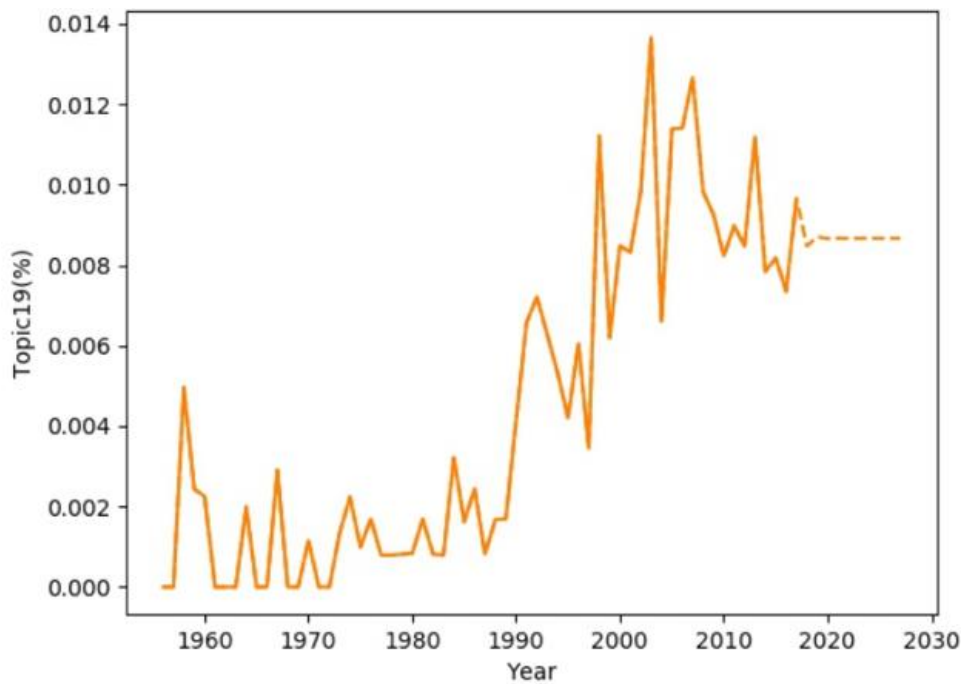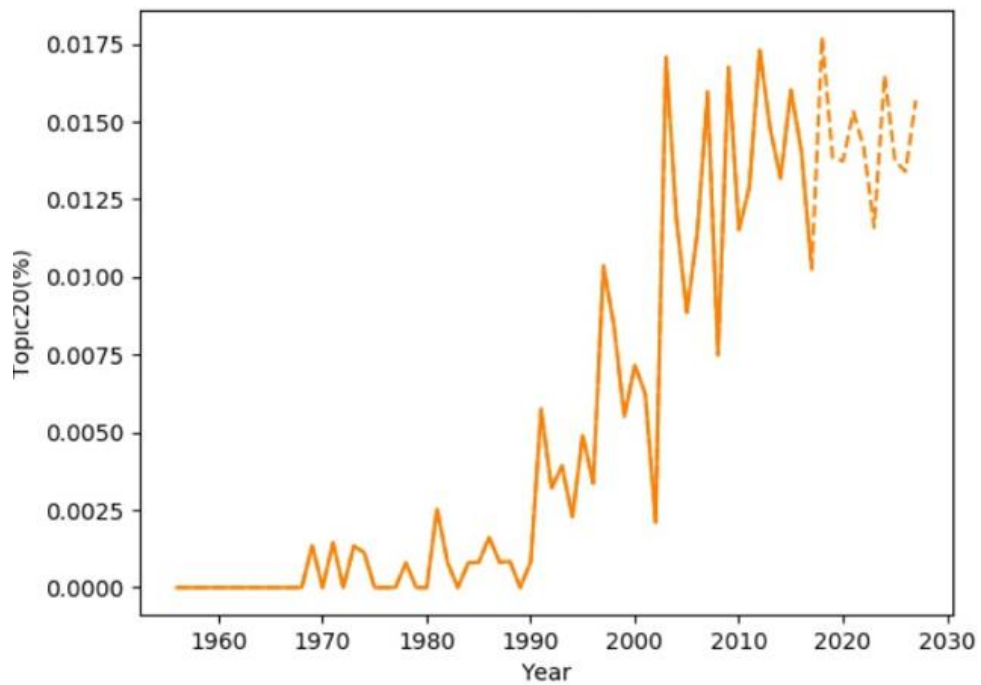

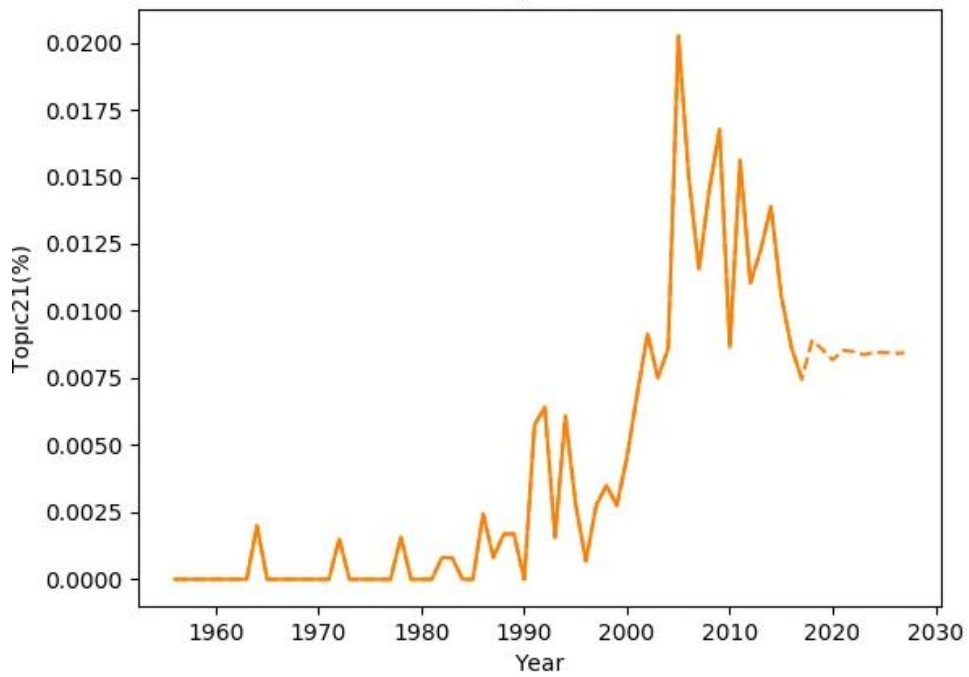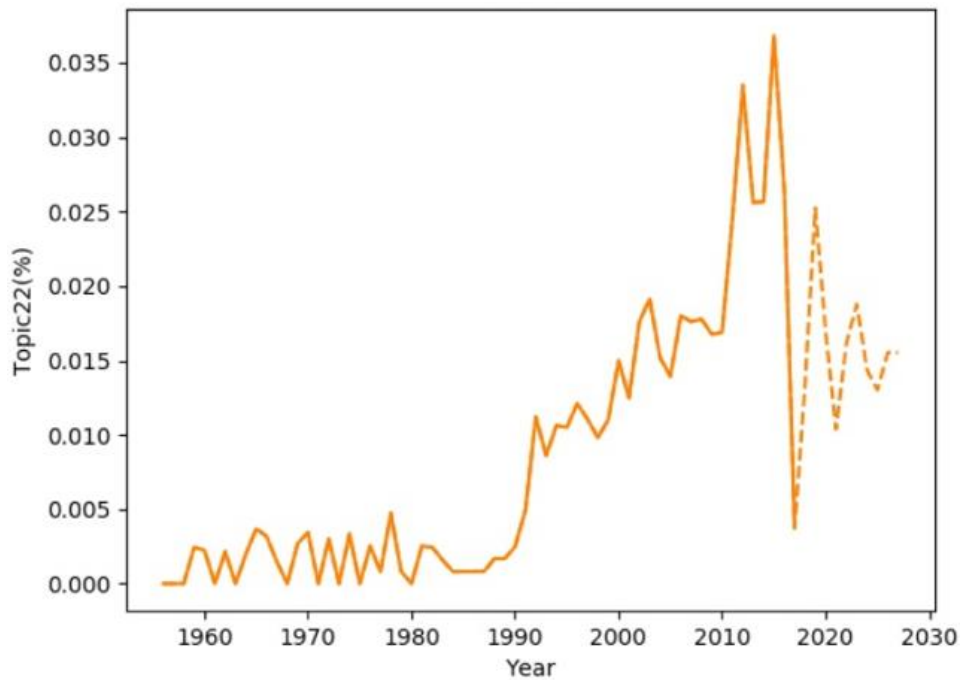

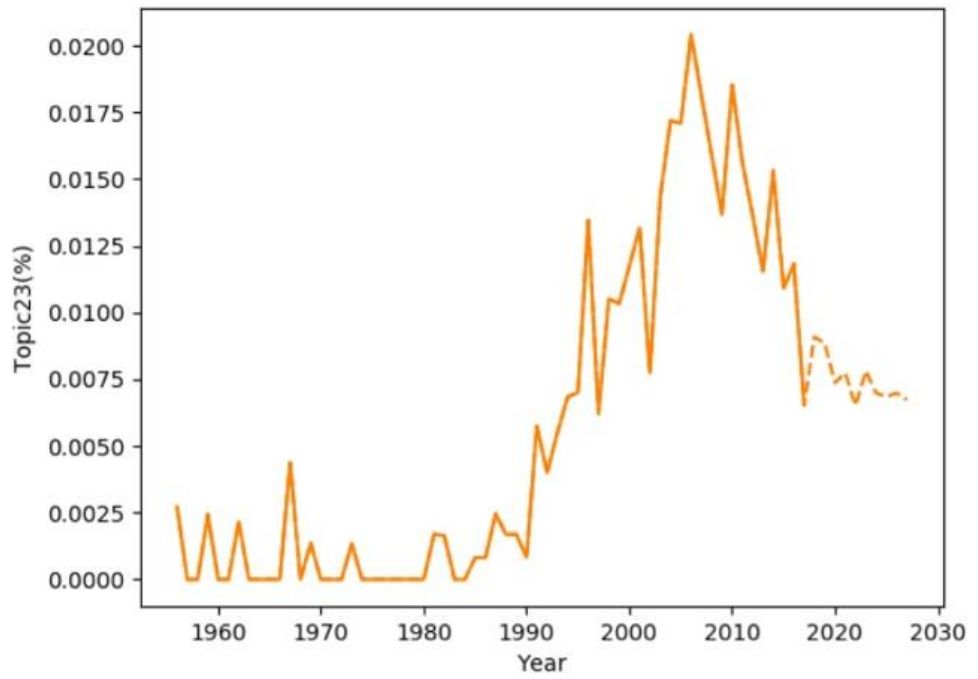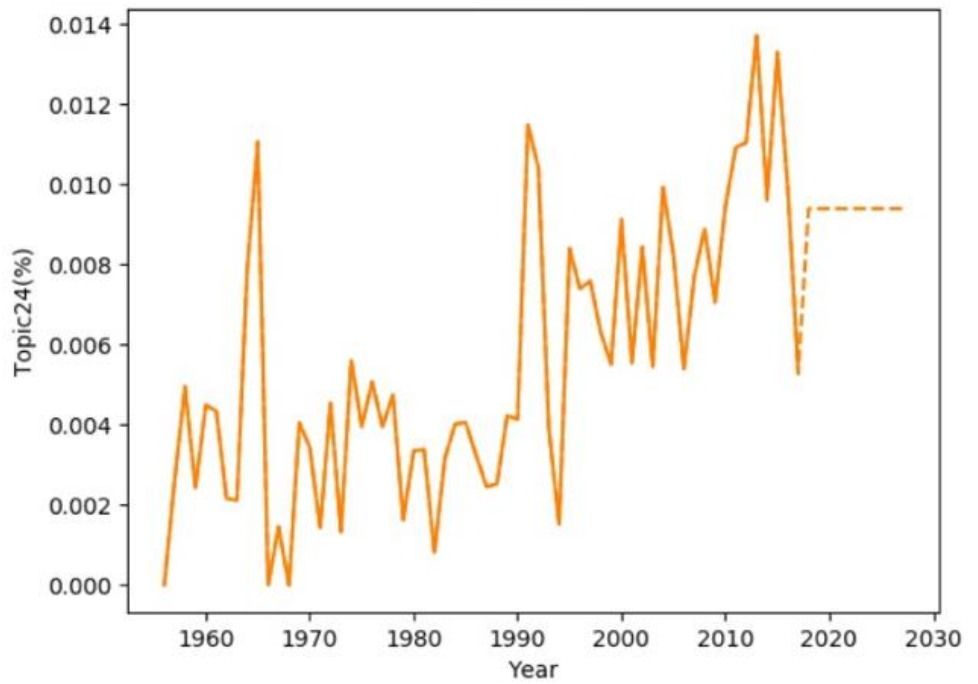

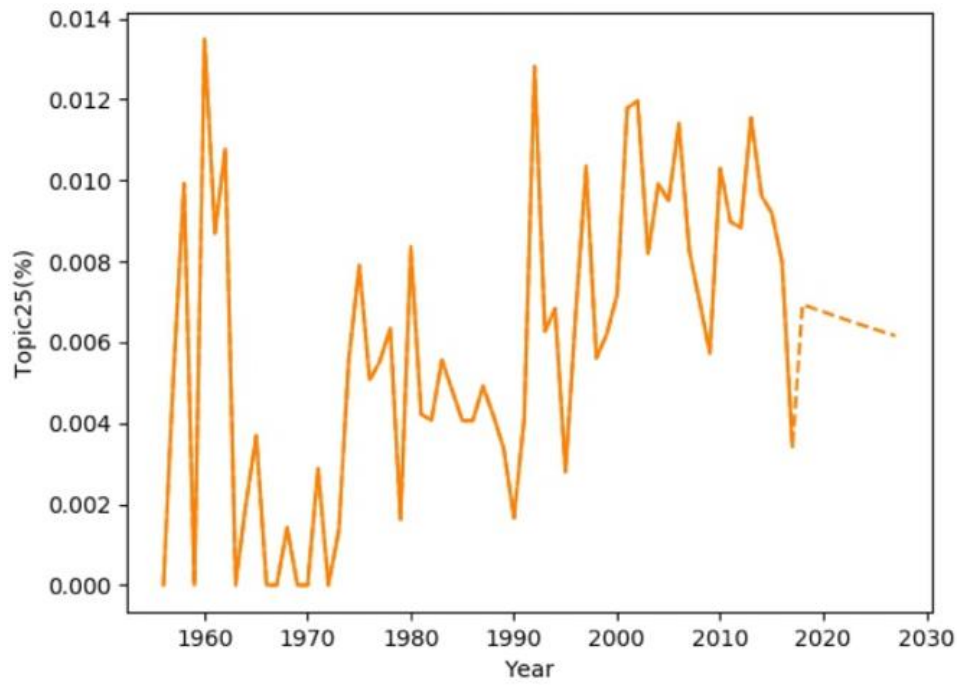

Supplement: pone.0199510.s001.pdf [file pone.0199510.s001.pdf]
